# Supplementary material for: Long-lasting geroprotection from brief rapamycin treatment in early adulthood by persistently increased intestinal autophagy
Source: PubMed Central journal article supplement (PMC10154223; doi:10.1038/s43587-022-00278-w), 2022-08-29
Supplement: 43587_2022_278_MOESM1_ESM.pdf [file 43587_2022_278_MOESM1_ESM.pdf]

---

**Supplementary information**

---

**Long-lasting geroprotection from brief rapamycin treatment in early adulthood by persistently increased intestinal autophagy**

---

In the format provided by the authors and unedited

1

# Supplementary Information

2

## Supplementary Table 1. Statistical analysis of survival data presented in Fig. 1a.

3

30-day switch – data before day 30 were censored  
n=400/treatment

| <b>p-value (log rank)</b> | control | rapamycin | rapamycin 30-end | rapamycin 1-30 |
|---------------------------|---------|-----------|------------------|----------------|
| median (d)                | 72.5    | 82        | 78               | 82             |
| mean (d)                  | 73.2    | 82.3      | 77.6             | 81.3           |
| control                   |         | 6.84E-27  | 2.13E-06         | 2.39E-13       |
| rapamycin chronic         |         |           | 1.04E-13         | 0.087215       |
| rapamycin 30-end          |         |           |                  | 2.88E-06       |

### Cox Proportional Hazard (CPH) analysis Risk Ratios

| Level 1          | /Level 2          | Risk Ratio | p       | Lower 95% | Upper 95% |
|------------------|-------------------|------------|---------|-----------|-----------|
| rapamycin        | control           | 0.4309059  | <0.0001 | 0.3734110 | 0.4977745 |
| rapamycin 1-30   | rapamycin chronic | 1.1543417  | 0.1266  | 0.9601738 | 1.3877745 |
| rapamycin 30-end | rapamycin chronic | 1.4612031  | <0.0001 | 1.2173019 | 1.7539727 |
| rapamycin 1-30   | rapamycin 30-end  | 0.6843676  | <0.0001 | 0.5701343 | 0.8214889 |

4

5

1  
2

**Supplementary Table 2.** Statistical analysis of survival data presented in Fig. 1b,c.

n=400/treatment

**Rapamycin day 45-end** – data before day 45 were censored  
**p-value (log rank)**

|                              | control | rapamycin | rapamyc<br>in 45-<br>end |
|------------------------------|---------|-----------|--------------------------|
| median (d)                   | 75.5    | 82        | 78                       |
| mean (d)                     | 73.8    | 83.2      | 76.3                     |
| control<br>rapamycin chronic |         | 1.22E-28  | 0.00030<br>3.7E-12       |

**Rapamycin day 60-end** – data before day 60 were censored  
**p-value (log rank)**

|                              | control | rapamycin | rapamyc<br>in 60-<br>end |
|------------------------------|---------|-----------|--------------------------|
| median (d)                   | 75.5    | 84        | 75.5                     |
| mean (d)                     | 76.9    | 84        | 77.7                     |
| control<br>rapamycin chronic |         | 1.09E-21  | 0.25631<br>5<br>5.38E-16 |

**Cox Proportional Hazard (CPH) analysis  
Parameter Estimates**

|                 | Term        | Estimate | SE       | p       |
|-----------------|-------------|----------|----------|---------|
| d30 v d45 start | rapamycin   | 0.13680  | 0.025308 | <0.0001 |
|                 | timing      | 0.00355  | 0.024808 | 0.8861  |
|                 | rapa*timing | 0.00975  | 0.024808 | 0.6943  |
| d45 v d60 start | rapamycin   | 0.07538  | 0.027004 | 0.0052  |
|                 | timing      | 0.05899  | 0.026677 | 0.0267  |
|                 | rapa*timing | 0.08447  | 0.026677 | 0.0016  |

3  
4

1  
2

**Supplementary Table 3.** Statistical analysis of survival data presented in Fig. 1d,e and 2a.

15-day switch  
n=400/treatment

| <b>p-value (log rank)</b> | control | rapamycin  | rapamycin 1-30 | rapamycin 15-30 | rapamycin 1-15 |
|---------------------------|---------|------------|----------------|-----------------|----------------|
| median (d)                | 72.5    | 77.5       | 80             | 77.5            | 77.5           |
| mean (d)                  | 72.1    | 77.7       | 77.5           | 76.0            | 77.5           |
| maximum (d)               | 89      | 91.5       | 91.5           | 91.5            | 91.5           |
| control                   |         | 1.2944E-10 | 2.0562E-13     | 7.585E-07       | 1.2016E-11     |
| rapamycin chronic         |         |            | 0.14736386     | 0.1908386       | 0.50923849     |
| rapamycin 1-30            |         |            |                | 0.0153711       | 0.51293879     |
| rapamycin 15-30           |         |            |                |                 | 0.07282181     |

**Cox Proportional Hazard (CPH) analysis**

**Risk Ratios**

| Level 1         | /Level 2          | Risk Ratio | p       | Lower 95% | Upper 95% |
|-----------------|-------------------|------------|---------|-----------|-----------|
| rapamycin       | control           | 0.6522501  | <0.0001 | 0.565943  | 0.751711  |
| rapamycin 1-15  | rapamycin chronic | 0.9632981  | 0.6074  | 0.834742  | 1.111281  |
| rapamycin 15-30 | rapamycin chronic | 1.0933126  | 0.2117  | 0.950452  | 1.257805  |
| rapamycin 1-15  | rapamycin 15-30   | 0.8809997  | 0.0792  | 0.764565  | 1.014886  |

1  
2

**Supplementary Table 4.** Statistical analysis of survival data presented in Extended Data Fig. 2e,f.

*TiGS/UAS-S6K const.act.*

n=200/treatment

| p-value (log rank) | EtOH | RU      | Rapa    | Rapa + RU | RU 1-30 | Rapa 1-30 | Rapa + RU 1-30 |
|--------------------|------|---------|---------|-----------|---------|-----------|----------------|
| median (d)         |      | 67      | 67      | 69        | 71      | 65        | 69             |
| mean (d)           |      | 66.5    | 65.8    | 70.4      | 71.4    | 63.8      | 67.3           |
| maximum (d)        |      | 75.5    | 75.5    | 82.5      | 82.5    | 75.5      | 80             |
| EtOH               |      | 0.37293 | 9.9E-05 | 9.27E-06  | 0.424   | 0.029619  | 0.001376       |
| RU                 |      |         | 0.00438 | 0.002346  | 0.8139  | 0.396167  | 0.071006       |
| Rapamycin          |      |         |         | 0.863832  | 0.0017  | 0.016441  | 0.16678        |
| Rapamycin + RU     |      |         |         |           | 0.0013  | 0.011603  | 0.229435       |
| RU 1-30            |      |         |         |           |         | 0.225444  | 0.020668       |
| Rapamycin 1-30     |      |         |         |           |         |           | 0.23175        |

**Cox Proportional Hazard (CPH) analysis**

**Risk Ratios**

| Level 1         | /Level 2            | Risk Ratio | p       | Lower 95% | Upper 95% |
|-----------------|---------------------|------------|---------|-----------|-----------|
| rapa chronic    | control             | 0.69202    | <0.0001 | 0.587187  | 0.8156    |
| induced chronic | non-induced chronic | 0.94363    | 0.4864  | 0.801264  | 1.1112    |
| rapa 1-30       | control             | 0.0799     | 0.0064  | 0.680384  | 0.9388    |
| induced 1-30    | non-induced 1-30    | 0.90581    | 0.2265  | 0.771479  | 1.0633    |

**Parameter Estimates**

|          | Term                | Estimate | SE     | p       |
|----------|---------------------|----------|--------|---------|
| chronic  | rapamycin           | 0.18407  | 0.0418 | <0.0001 |
|          | induction           | -0.0290  | 0.0416 | 0.4864  |
|          | rapamycin*induction | -0.0271  | 0.0418 | 0.5164  |
| day 1-30 | rapamycin           | 0.11219  | 0.0410 | 0.0064  |
|          | induction           | -0.0494  | 0.0400 | 0.2265  |
|          | rapamycin*induction | -0.0045  | 0.0408 | 0.911   |

3

1  
2  
3

**Supplementary Table 5.** Statistical analysis of survival data presented in Fig. 4a,b.

5966GS/UAS-Atg5<sup>RNAi</sup>  
n=400/treatment

| <b>p-value (log rank)</b> | EtOH | RU       | Rapa     | Rapa + RU | RU 1-15 | Rapa1-15 | Rapa+ RU 1-15 |      |
|---------------------------|------|----------|----------|-----------|---------|----------|---------------|------|
| median (d)                |      | 57       | 59       | 61.5      | 61.5    | 61.5     | 64            | 61.5 |
| mean (d)                  |      | 58.2     | 59.1     | 62.7      | 59.9    | 59.1     | 63.7          | 60.9 |
| maximum (d)               |      | 68       | 70.5     | 70.5      | 68      | 70.5     | 70.5          | 70.5 |
| EtOH                      |      | 0.467679 | 1.53E-05 | 0.156857  | 0.43617 | 8.8E-10  | 0.012342      |      |
| RU                        |      |          | 7.48E-05 | 0.253446  | 0.84502 | 2.4E-08  | 0.056321      |      |
| rapamycin                 |      |          |          | 0.000263  | 9.8E-05 | 0.03165  | 0.030291      |      |
| rapamycin + RU            |      |          |          |           | 0.51559 | 5.4E-09  | 0.327552      |      |
| RU 1-15                   |      |          |          |           |         | 7.4E-09  | 0.097373      |      |
| rapamycin 1-15            |      |          |          |           |         |          | 8.44E-05      |      |
| rapamycin + RU 1-15       |      |          |          |           |         |          |               |      |

**Cox Proportional Hazard (CPH) analysis**

**Risk Ratios**

| Level 1         | /Level 2            | Risk Ratio | p       | Lower 95% | Upper 95% |
|-----------------|---------------------|------------|---------|-----------|-----------|
| rapa chronic    | control             | 0.740356   | 0.0006  | 0.624593  | 0.87815   |
| induced chronic | non-induced chronic | 1.123287   | 0.1774  | 0.948662  | 1.33023   |
| rapa 1-15       | control             | 0.553101   | <0.0001 | 0.461037  | 0.66278   |
| induced 1-15    | non-induced 1-15    | 0.960025   | 0.6559  | 0.802404  | 1.149     |

**Parameter Estimates**

|          | Term                | Estimate  | SE       | p       |
|----------|---------------------|-----------|----------|---------|
| chronic  | rapamycin           | 0.150312  | 0.043435 | 0.0006  |
|          | induction           | 0.05813   | 0.043093 | 0.11774 |
|          | rapamycin*induction | -0.083593 | 0.043034 | 0.0516  |
| day 1-15 | rapamycin           | 0.203859  | 0.044964 | <0.0001 |
|          | induction           | 0.0543    | 0.044685 | 0.2246  |
|          | rapamycin*induction | -0.074401 | 0.044552 | 0.0948  |

1 **Supplementary Table 6.** Statistical analysis of survival data presented in Fig. 4c,d.

*5961GS/UAS-Atg5<sup>RNAi</sup>*  
n=200/treatment

| p-value (log rank)  | EtOH | RU       | Rapa     | Rapa + RU | RU 1-15 | Rapa 1-15 | Rapa + RU 1-15 |
|---------------------|------|----------|----------|-----------|---------|-----------|----------------|
| median (d)          |      | 54.5     | 54.5     | 61.5      | 61.5    | 54.5      | 61.5           |
| mean (d)            |      | 54.1     | 55.4     | 59.7      | 60.3    | 55.3      | 62.4           |
| maximum (d)         |      | 68       | 70.5     | 69        | 68      | 61.5      | 70.5           |
| EtOH                |      | 0.233667 | 3.4E-06  | 3.49E-06  | 0.5718  | 8.2E-13   | 1.93E-12       |
| RU                  |      |          | 0.001097 | 0.001491  | 0.4706  | 2.8E-09   | 1.1E-08        |
| rapamycin           |      |          |          | 0.73857   | 1E-05   | 0.00529   | 0.011967       |
| rapamycin + RU      |      |          |          |           | 2.4E-05 | 0.00053   | 0.001288       |
| RU 1-15             |      |          |          |           |         | 8.2E-12   | 5.4E-12        |
| rapamycin 1-15      |      |          |          |           |         |           | 0.386465       |
| rapamycin + RU 1-15 |      |          |          |           |         |           |                |

**Cox Proportional Hazard (CPH) analysis**

**Risk Ratios**

| Level 1         | /Level 2            | Risk Ratio | p       | Lower 95% | Upper 95% |
|-----------------|---------------------|------------|---------|-----------|-----------|
| rapa chronic    | control             | 0.630867   | <0.0001 | 0.526928  | 0.75437   |
| induced chronic | non-induced chronic | 0.929143   | 0.4213  | 0.776204  | 1.11124   |
| rapa 1-15       | control             | 0.553101   | <0.0001 | 0.461037  | 0.66278   |
| induced 1-15    | non-induced 1-15    | 0.960025   | 0.6559  | 0.802404  | 1.149     |

**Parameter Estimates**

|          | Term                | Estimate  | SE       | p       |
|----------|---------------------|-----------|----------|---------|
| chronic  | rapamycin           | 0.23033   | 0.045737 | <0.0001 |
|          | induction           | -0.036746 | 0.045736 | 0.4213  |
|          | rapamycin*induction | -0.022517 | 0.045743 | 0.6225  |
| day 1-15 | rapamycin           | 0.138892  | 0.03734  | 0.0002  |
|          | induction           | 0.15442   | 0.037407 | <0.0001 |
|          | rapamycin*induction | -0.024520 | 0.03722  | 0.5101  |

2  
3

1  
2  
3

**Supplementary Table 7.** Statistical analysis of survival data presented in Fig. 5b,c.

5966GS/UAS-Atg1<sup>OE</sup>

n=200/treatment (Fig. 5b) and 160/treatment (Fig. 5c)

| <b>p-value (log rank)</b> |      |      |         |          |          |
|---------------------------|------|------|---------|----------|----------|
|                           | EtOH | RU   | Rapa    | Rapa+ RU |          |
| median (d)                |      | 60   | 67      | 64.5     | 64.5     |
| mean (d)                  |      | 59.2 | 66.4    | 64.4     | 63.5     |
| maximum (d)               |      | 71.5 | 71.5    | 71.5     | 71.5     |
| EtOH                      |      |      | 3.6E-11 | 5.68E-06 | 8.49E-05 |
| RU                        |      |      |         | 0.046318 | 0.004648 |
| rapamycin                 |      |      |         |          | 0.506055 |
| rapamycin + RU            |      |      |         |          |          |

  

|                     | EtOH | RU 1-15 | Rapa 1-15 | Rapa + RU 1-15 |          |
|---------------------|------|---------|-----------|----------------|----------|
| median (d)          |      | 60.5    | 67.5      | 67.5           | 67.5     |
| mean (d)            |      | 60.3    | 66.8      | 67.3           | 67.8     |
| maximum (d)         |      | 74.5    | 74.5      | 74.5           | 74.5     |
| EtOH                |      |         | 6.72E-5   | 1.00E-06       | 1.84E-07 |
| RU 1-15             |      |         |           | 0.371120       | 0.212741 |
| rapamycin 1-15      |      |         |           |                | 0.697781 |
| rapamycin + RU 1-15 |      |         |           |                |          |

**Cox Proportional Hazard (CPH) analysis**

**Risk Ratios**

| Level 1         | /Level 2            | Risk Ratio | p       | Lower 95% | Upper 95% |
|-----------------|---------------------|------------|---------|-----------|-----------|
| rapa chronic    | control             | 0.567652   | <0.0001 | 0.461557  | 0.70218   |
| induced chronic | non-induced chronic | 0.380319   | <0.0001 | 0.307387  | 0.47305   |
| rapa 1-15       | control             | 0.725947   | 0.0002  | 0.613941  | 0.85838   |
| induced 1-15    | non-induced 1-15    | 0.790212   | 0.0059  | 0.668278  | 0.93439   |

**Parameter Estimates**

|          | Term                | Estimate  | SE       | p       |
|----------|---------------------|-----------|----------|---------|
| chronic  | rapamycin           | -0.283123 | 0.053447 | <0.0001 |
|          | induction           | -0.483371 | 0.054918 | <0.0001 |
|          | rapamycin*induction | 0.156973  | 0.052663 | 0.0036  |
| day 1-15 | rapamycin           | 0.160138  | 0.042750 | 0.0002  |
|          | induction           | -0.117726 | 0.042755 | 0.0059  |
|          | rapamycin*induction | -0.107443 | 0.042741 | 0.0119  |

4  
5  
6  
7



1  
2  
3

**Supplementary Table 8.** Statistical analysis of survival data presented in Extended Data Fig. 4c.

*5966GS/UAS-H3/H4<sup>OE</sup>*  
n=200/treatment

| p-value (log rank) | EtOH | RU       | RU 1-15 |
|--------------------|------|----------|---------|
| median (d)         | 66.6 | 71.0     | 66.6    |
| mean (d)           | 66.9 | 71.0     | 67.5    |
| maximum (d)        | 82.0 | 89.0     | 86.0    |
| control            |      | 7.38E-06 | 0.59709 |
| RU                 |      |          | 0.00011 |

4  
5  
6  
7  
8  
9  
10  
11  
12  
13

**Supplementary Table 9.** Statistical analysis of survival data presented in Extended Data Fig. 7c.

*5966GS/UAS-BCAT<sup>RNAi</sup>*  
n=180/treatment

| p-value (log rank)  | EtOH | RU 1-15  | Rapa 1-15 | Rapa + RU 1-15 |
|---------------------|------|----------|-----------|----------------|
| median (d)          | 79.0 | 79.0     | 81.5      | 79.0           |
| mean (d)            | 80.6 | 80.5     | 82.2      | 80.9           |
| maximum (d)         | 86.0 | 88.5     | 91.0      | 88.5           |
| EtOH                |      | 0.699135 | 7.83E-04  | 0.050575       |
| RU 1-15             |      |          | 0.002971  | 0.138767       |
| rapamycin 1-15      |      |          |           | 0.150979       |
| rapamycin + RU 1-15 |      |          |           |                |
